# Supplementary material for: Nucleation and growth of a helical nanofilament (B4) liquid-crystal phase confined in nanobowls
Source: Royal Society of Chemistry journal article supplement (doi:10.1039/c5sm01783a), 2015-01-01
Supplement: c5sm01783a1.pdf [file c5sm01783a1.pdf]

## Supporting Information for:

# Nucleation and growth of helical nanofilament (B4) liquid-crystal phase confined in nanobowls

Seong Ho Ryu,<sup>a</sup> Hanim Kim,<sup>a</sup> Sunhee Lee,<sup>a</sup> Yun Jeong Cha,<sup>a</sup> Tae Joo Shin,<sup>b</sup> Hyungju Ahn,<sup>c</sup> Eva Korblova,<sup>d</sup>  
David M. Walba,<sup>d</sup> Noel A. Clark,<sup>e</sup> Sang Bok Lee<sup>a,f</sup> and Dong Ki Yoon<sup>\*a</sup>

<sup>a</sup>Graduate School of Nanoscience and Technology and KINC, KAIST, Daejeon, 305-701, Republic of  
Korea

<sup>b</sup>UNIST Central Research Facilities & School of Natural Science, UNIST, Ulsan, 689-789, Republic of  
Korea

<sup>c</sup>Pohang Accelerator Laboratory, POSTECH, Pohang, 790-784, Republic of Korea

<sup>d</sup>Department of Chemistry and Soft Materials Research Center, University of Colorado, Boulder, CO  
80309, United States

<sup>e</sup>Department of Physics and Soft Materials Research Center, University of Colorado, Boulder, CO  
80309, United States

<sup>f</sup>Department of Chemistry and Biochemistry, University of Maryland, College Park, MD 20742, United  
States

**\*Corresponding author** Email: [nandk@kaist.ac.kr](mailto:nandk@kaist.ac.kr)

**Figure S1**

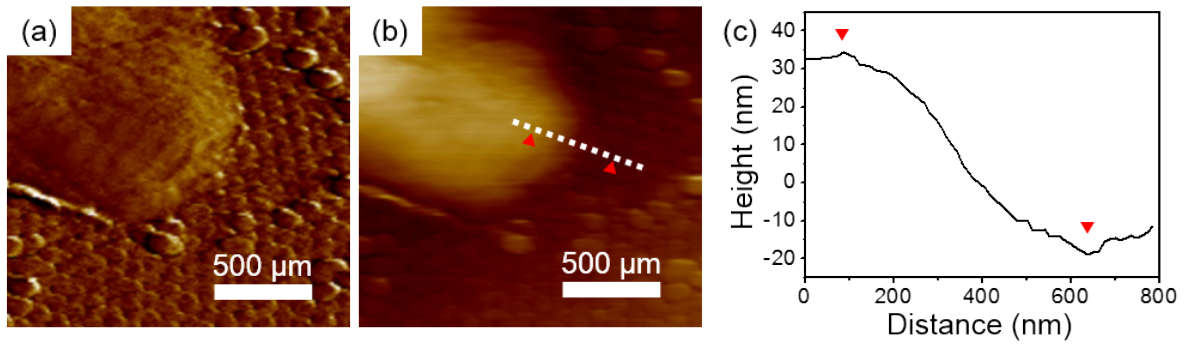

**Fig. S1.** Transition from the confined nanostructures to bulk HNFs. (a) The AFM deflection error, (b) height images and (c) the corresponding height profile.

**Figure S2**

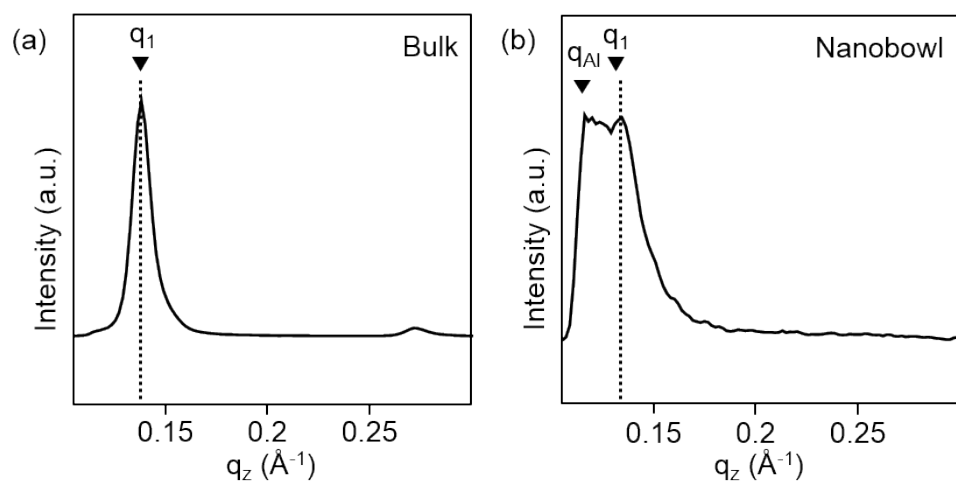

**Fig. S2.** The 1D line-cut graphs from the resultant GIXD 2D pattern of (a) the bulk sample and (b) the confined structure in the nanobowls.

**Figure S3**

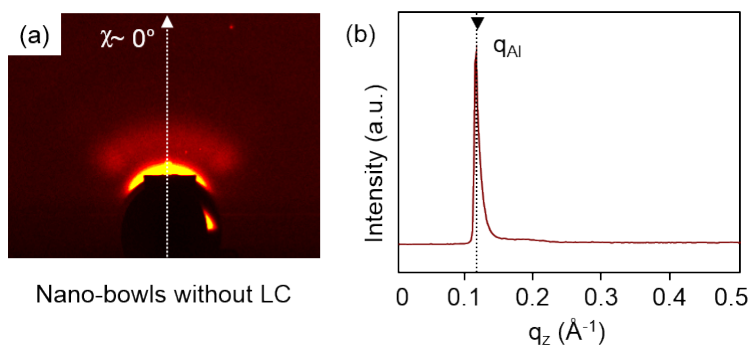

**Fig. S3.** The resultant GIXD 2D pattern of the nanobowls without sample and corresponding 1D line-cut
